# Supplementary material for: Stillage Waste from Strawberry Spirit Production as a Source of Bioactive Compounds with Antioxidant and Antiproliferative Potential
Source: MDPI journal article supplement (doi:10.3390/antiox12020421), 2023-02-09
Supplement: s1 [file s1]

# Stillage Waste from Strawberry Spirit Production as a Source of Bioactive Compounds with Antioxidant and Antiproliferative Potential

Carmela Spagnuolo <sup>1,\*</sup>, Federica Moccia <sup>2</sup>, Idolo Tedesco <sup>1</sup>, Eva Adabbo <sup>1</sup>, Lucia Panzella <sup>2,\*</sup>,  
Gian Luigi Russo <sup>1</sup> and Alessandra Napolitano <sup>2</sup>

<sup>1</sup> Institute of Food Sciences, National Research Council, I-83100 Avellino, Italy

<sup>2</sup> Department of Chemical Sciences, University of Naples "Federico II", I-80126 Napoli, Italy

\* Correspondence: carmela.spagnuolo@isa.cnr.it (C.S.); panzella@unina.it (L.P.); Tel.: +39-0825299261 (C.S.); +39-081674131 (L.P.)

## Table of contents

## Page

Figure S1. HPLC profiles of SE.

1

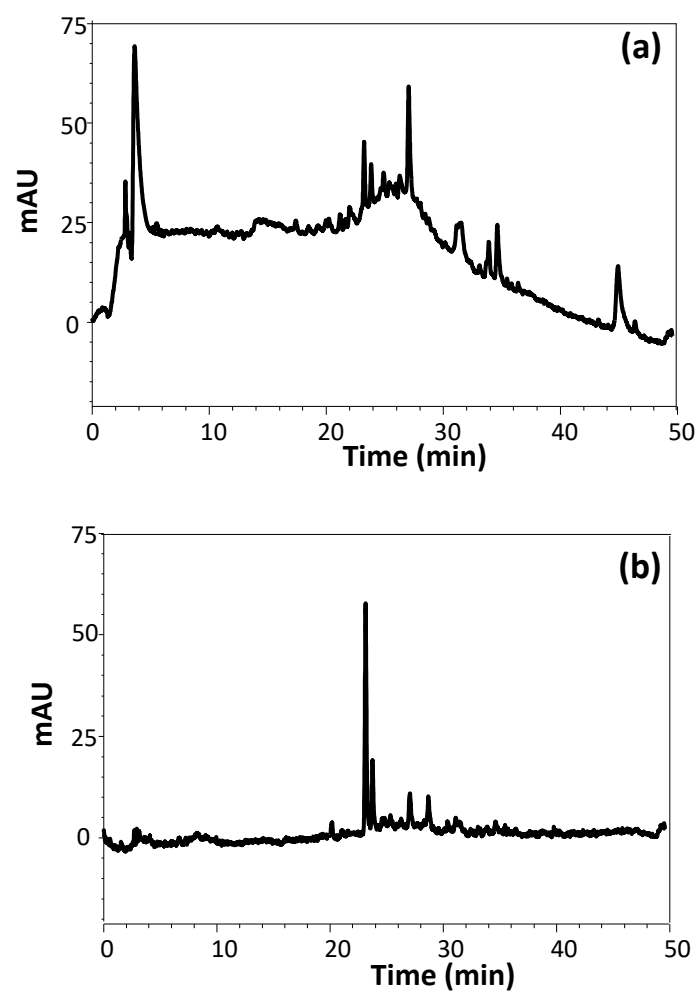

**Figure S1.** HPLC profile of SE (diluted 1:5 v/v in methanol), recorded at (a) 254 nm and (b) 320 nm.
